# Supplementary material for: In Arabidopsis hybrids and Hybrid Mimics, up‐regulation of cell wall biogenesis is associated with the increased plant size
Source: PubMed Central journal article supplement (PMC6834268; doi:10.1002/pld3.174), 2019-11-06
Supplement: PLD3-3-e00174-s001.pdf [file PLD3-3-e00174-s001.pdf]

**Fig.S1**

# Ws/Ler F1 hybrids

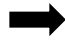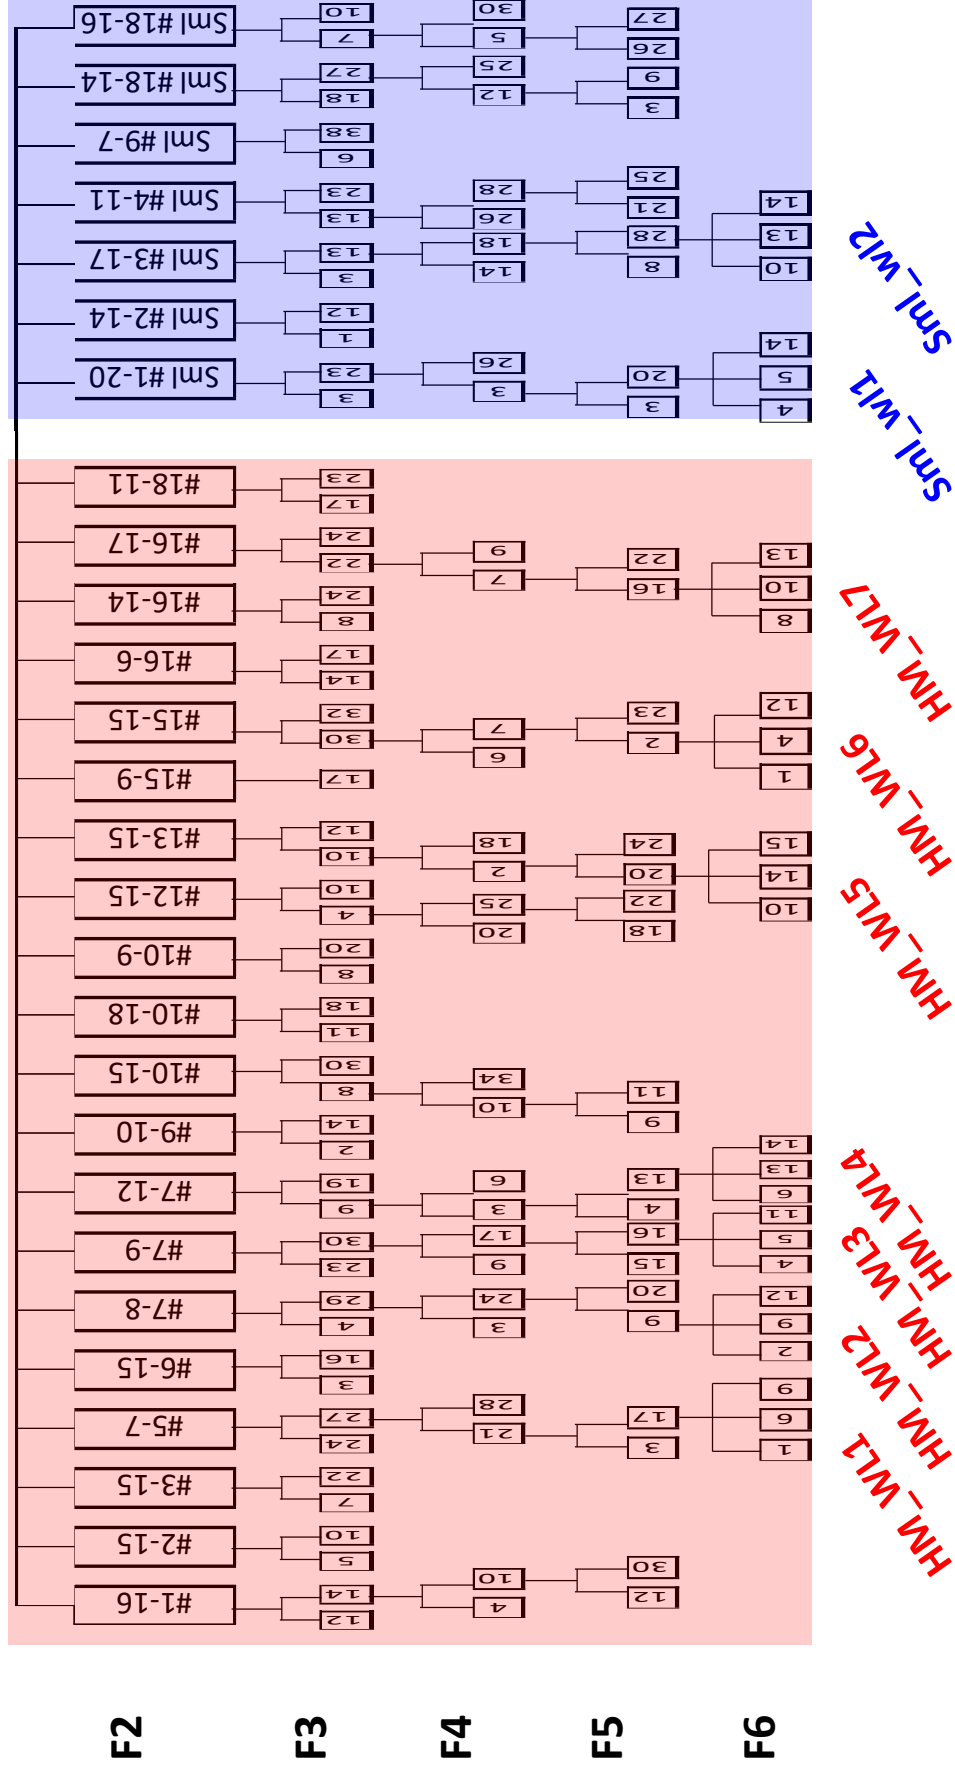

# Family tree of Ws/Ler HM & Small lines

**Figure S1. The genealogical tree of Hybrid Mimic selection from Ws/Ler system.** 20 large and 7 small F2 plants were selected from a F2 population of 300 plants. The 20 large and 7 small F2 plants were selfed and 30 F3 seeds from each grown as F3 lines. 39 large and 14 small F3 plants were selected to produce F4 offspring. In F4, 20 large and 10 small plant lines were analysed with 30 plants grown per line, and 20 large and 10 small F4 plants were selected for generating the F5; seven large plants and two small plants were selected in the F5 to produce the F6 seeds. The seven F6 large plant lines were referred as Ws/Ler Hybrid Mimic 1-7 (WL\_HM1-7). The two F6 small lines were referred as Ws/Ler small line 1 and 2 (wl\_sml1-2).

Fig.S2

# Col/Ler F1 hybrids

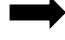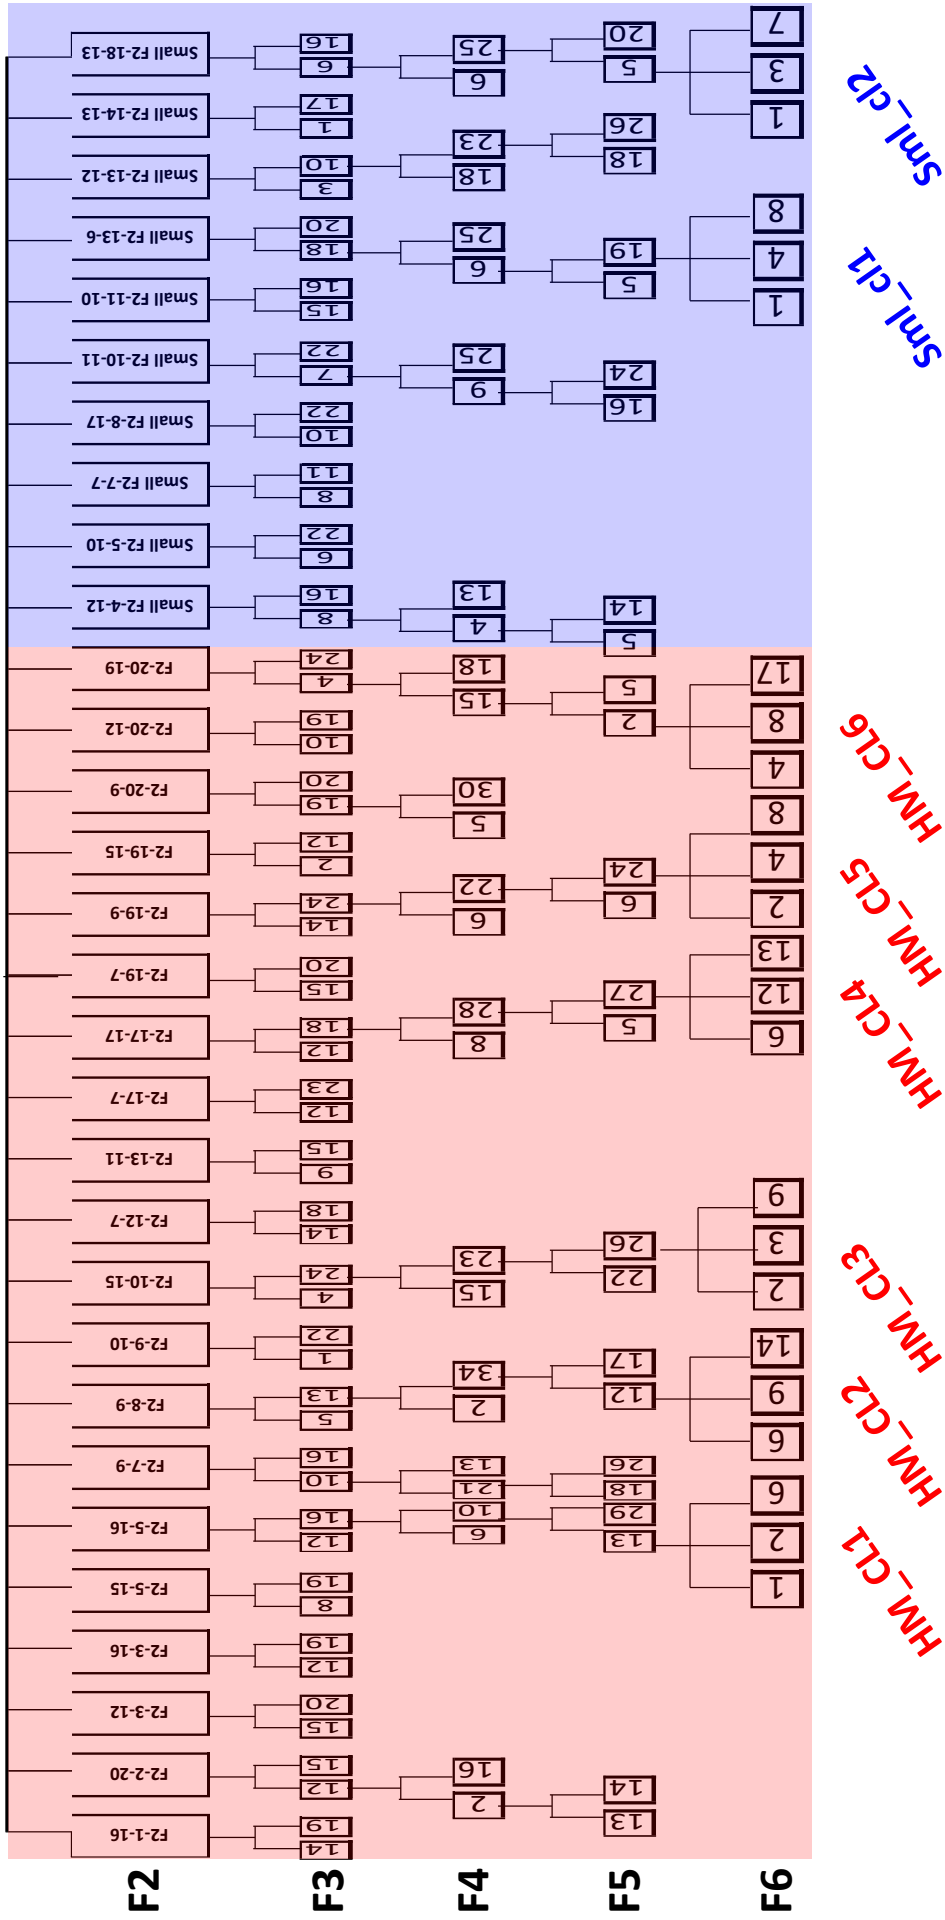

## Family tree of Col/Ler HM & Small lines

Large line

Small line

HM\_CL1  
HM\_CL2  
HM\_CL3  
HM\_CL4  
HM\_CL5  
HM\_CL6

Sml\_CL1  
Sml\_CL2

**Figure S2. The genealogical tree of Hybrid Mimic selection from Col/Ler system.** 20 large and 10 small F<sub>2</sub> plants were selected from a F<sub>2</sub> population of 300 plants. The 20 large and 10 small F<sub>2</sub> plants were selfed and 30 F<sub>3</sub> seeds from each grown as F<sub>3</sub> lines. 40 large and 20 small F<sub>3</sub> plants were selected to produce F<sub>4</sub> offspring. In F<sub>4</sub>, 20 large and 10 small plant lines were analysed with 30 plants grown per line, and 18 F<sub>4</sub> large and 10 small plants were selected for generating F<sub>5</sub>; 6 large plants and 2 small plants were selected in the F<sub>5</sub> to produce the F<sub>6</sub> seeds. The selected six F<sub>6</sub> large plant lines were referred as Col/Ler Hybrid Mimic 1-6 (CL\_HM1-6). The selected two F<sub>6</sub> small lines were referred as Col/Ler small line 1 and 2 (cl\_sml1-2). CL\_HM5 and CL\_HM6 were excluded from the transcriptome analysis due to unsatisfactory phenotypes of plant size at sampling day (25 DAS).

**Fig.S3**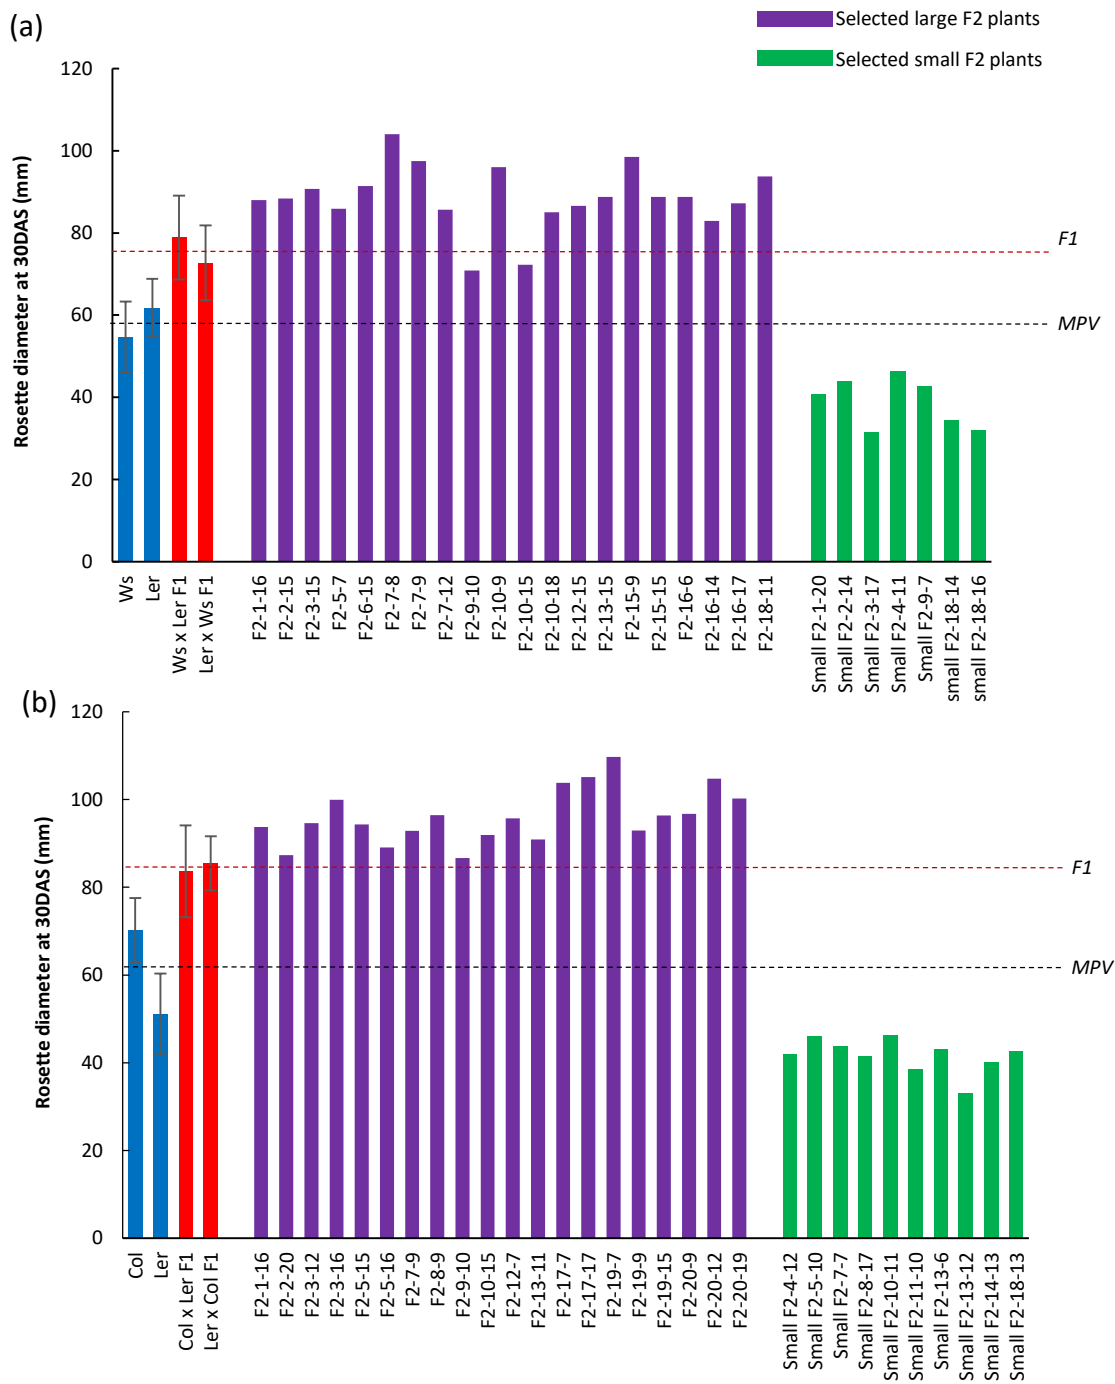

**Figure S3. Rosette diameters of large and small F2 plants selected from Ws/Ler and Col/Ler systems at 30 DAS.** (a) 20 large and 7 small F2 plants were selected from Ws/Ler system. (b) 20 large and 10 small F2 plants were selected from Col/Ler system. The blue/red/purple/green colours represent parents/hybrids/large F2 plants/small F2 plants. Black dotted line represents MPV. Red dotted line represents the average rosette diameter of two reciprocal hybrids. Error bars = SE.  $n > 20$ .

# Fig.S4

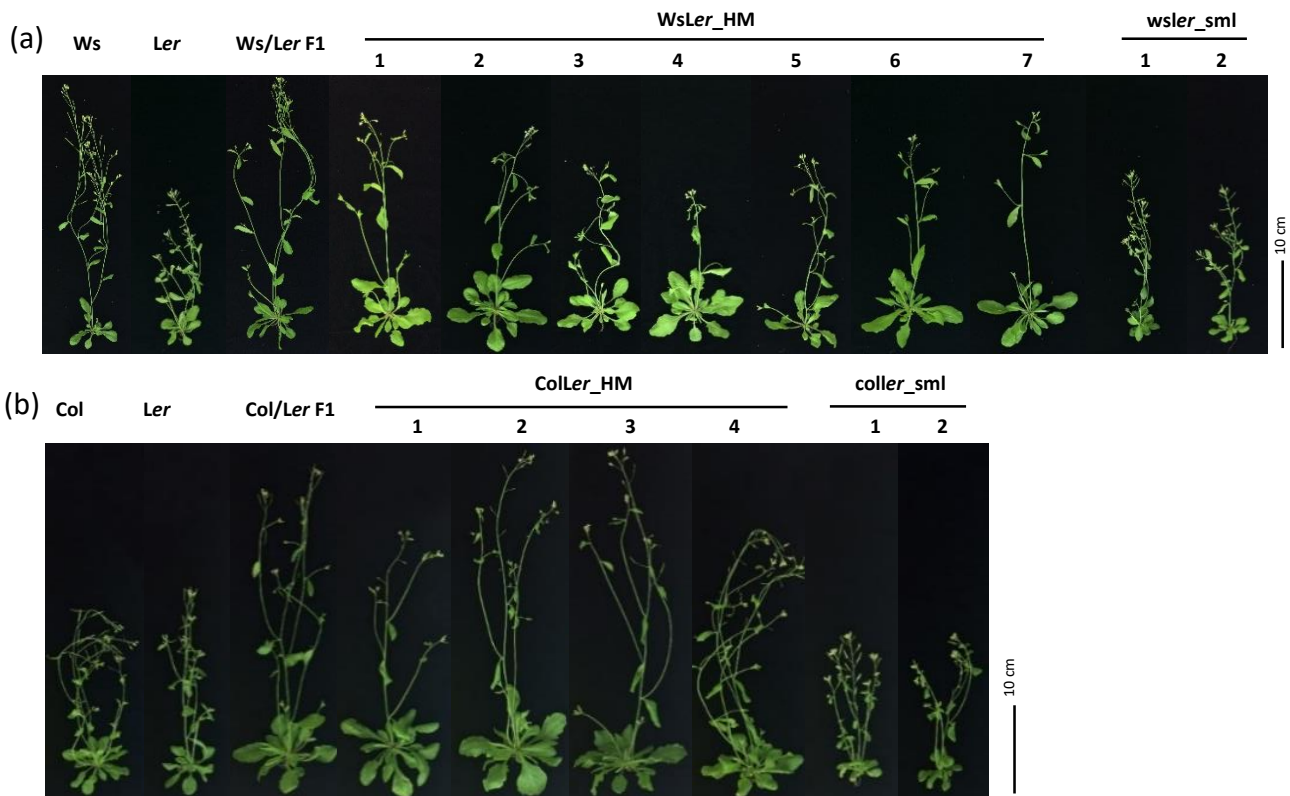

**Figure S4. Hybrid Mimics selected from Ws/Ler and Col/Ler systems had increased rosette sizes at 30 DAS.** (a) Plant phenotypes of the wild-type parents Ws and Ler, Ws/Ler hybrids, representative plants of seven Hybrid Mimic lines (WsLer\_HM 1-7) and two small lines (wslersml1 and 2) at 30 DAS. (b) Plant phenotypes of the parents Col and Ler, Col/Ler hybrids, representative plants of four Hybrid Mimic lines (ColLer\_HM 1-4) and two small line (collersml1 and 2) at 30 DAS. Scale bar = 10 cm.

(a)

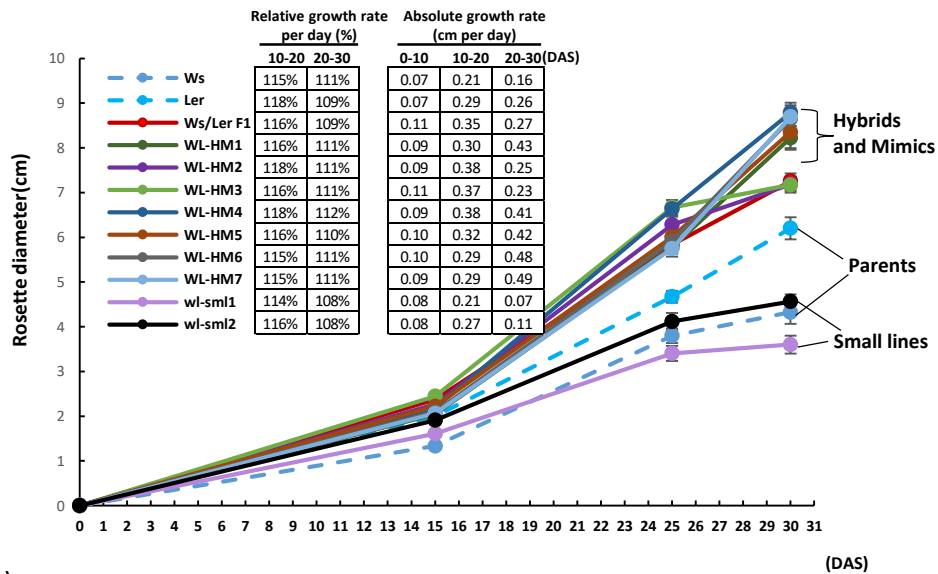

(b)

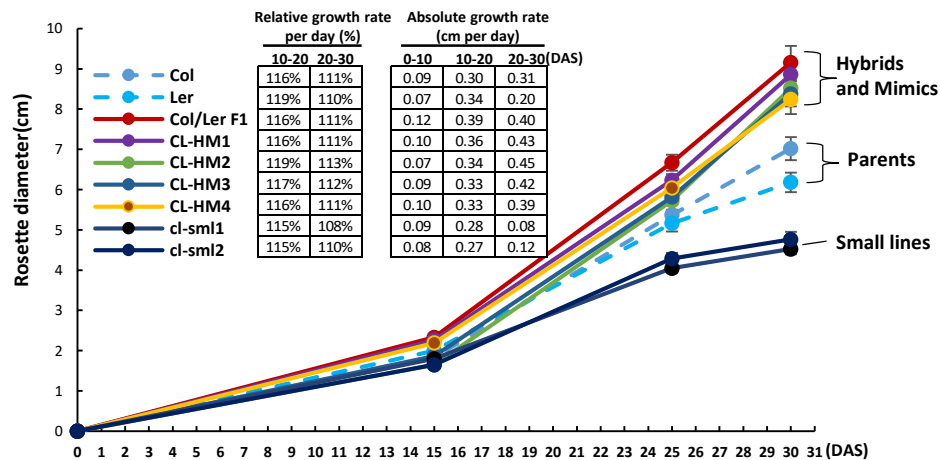

(c)

|                   | Ws   | Ler  | Ws/Ler F1 | WL_HM1 | WL_HM2 | WL_HM3 | WL_HM4 | WL_HM5 | WL_HM6 | WL_HM7 | wl_sml1 | wl_sml2 |
|-------------------|------|------|-----------|--------|--------|--------|--------|--------|--------|--------|---------|---------|
| RD at 15 DAS (cm) | 1.3  | 2.0  | 2.4       | 2.0    | 2.3    | 2.4    | 2.2    | 2.2    | 2.1    | 2.1    | 1.6     | 1.9     |
| SE                | 0.05 | 0.08 | 0.08      | 0.08   | 0.06   | 0.06   | 0.04   | 0.06   | 0.06   | 0.06   | 0.06    | 0.10    |

  

|                   | Col  | Ler  | Col/Ler F1 | CL_HM1 | CL_HM2 | CL_HM3 | CL_HM4 | cl_sml1 | cl_sml2 |
|-------------------|------|------|------------|--------|--------|--------|--------|---------|---------|
| RD at 15 DAS (cm) | 1.8  | 2.0  | 2.3        | 2.3    | 1.7    | 1.9    | 2.2    | 1.8     | 1.6     |
| SE                | 0.03 | 0.08 | 0.07       | 0.03   | 0.05   | 0.07   | 0.06   | 0.05    | 0.06    |

**Figure S5. Hybrid Mimics selected from Ws/Ler and Col/Ler systems showed growth patterns**

**similar to the hybrids.** (a) Growth course of parents Ws and Ler, Ws/Ler hybrids, seven Hybrid Mimic

lines (WsLer\_HM 1-7) and two small lines (wsler\_sml1-2). Error bars = SE, n = 12 - 15. (b) Growth

course of parents Col and Ler, Col/Ler hybrids, four Hybrid Mimic lines (ColLer\_HM 1 and 4) and two

small lines (coller\_sml1-2). Error bars = SE, n = 17 - 20. (c) The rosette diameter of parents, hybrids and

F7 lines in the Ws/Ler and Col/Ler systems.



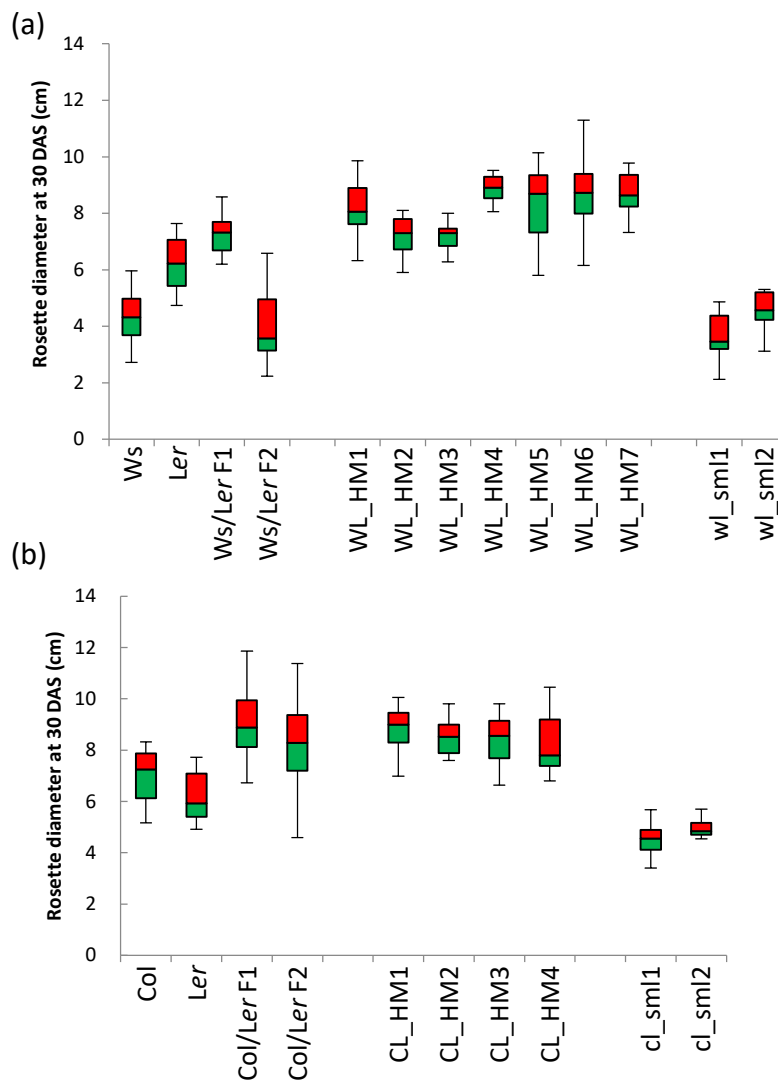

**Figure S6. Hybrid Mimics showed large rosette sizes and uniformity close to F1.** (a) Box-plots showing the uniformity of parent *Ws* and *Ler*, *Ws/Ler* hybrids, F2 population, seven F7 Hybrid Mimic lines (*WsLer\_HM* 1-7) and two F7 small line (*wsler\_sml*1-2) in rosette diameter at 30 DAS. Error bars = SE, n = 14 - 20. (b) Box-plots showing the uniformity of parent *Col* and *Ler*, *Col/Ler* hybrids, F2 population, four F7 Hybrid Mimic lines (*ColLer\_HM* 1 and 4) and two F7 small line (*coller\_sml*1-2) in rosette diameter at 30 DAS. Error bars = SE, n = 11 - 20.

**Fig.S7**

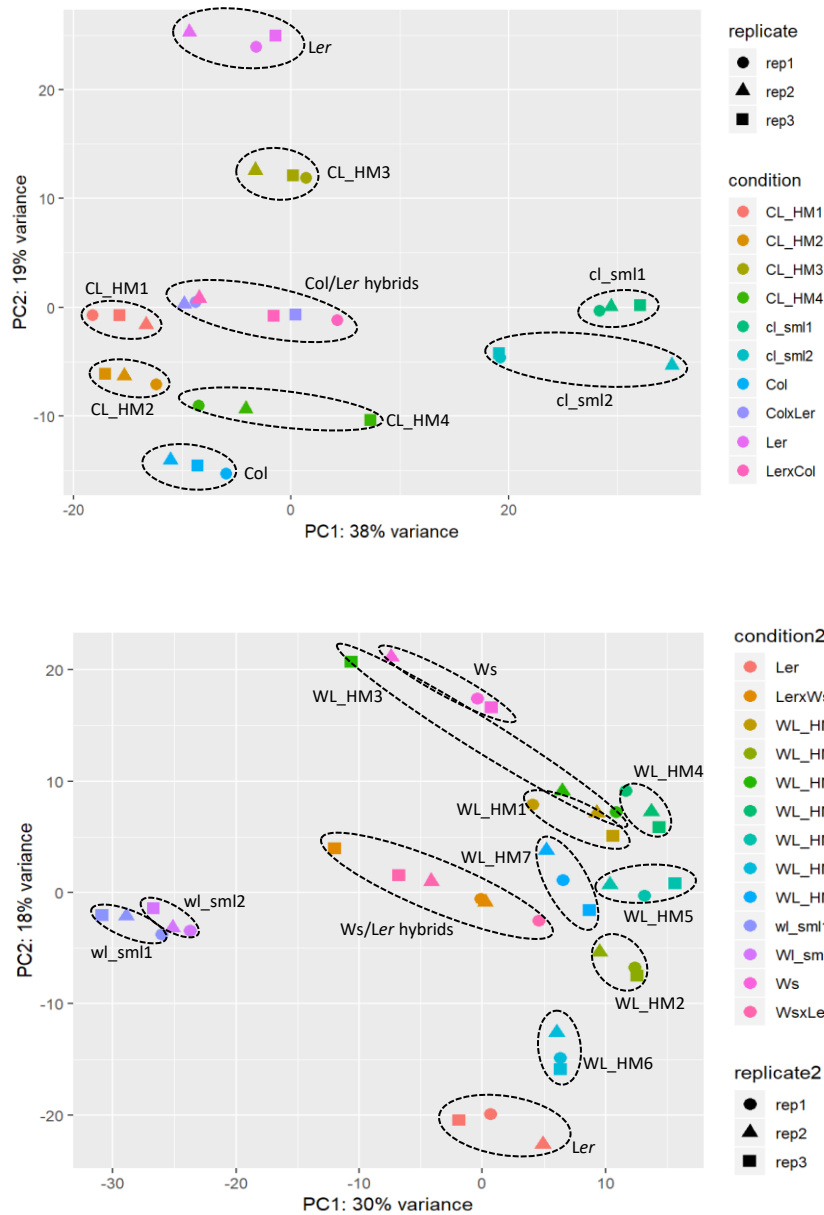

**Figure S7. Principal component analysis (PCA) of the transcriptome data showed similarity of the gene expression patterns in hybrids and Mimics.**

# Fig.S8

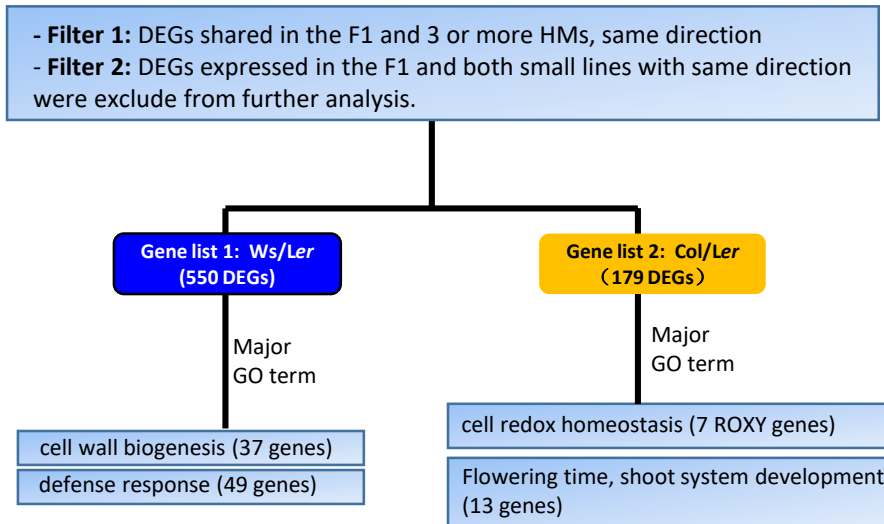

**Figure S8. Workflow of identification of major pathways in the shared differentially expression genes in the F1 hybrids and Hybrid Mimics.**

**Fig.S9**

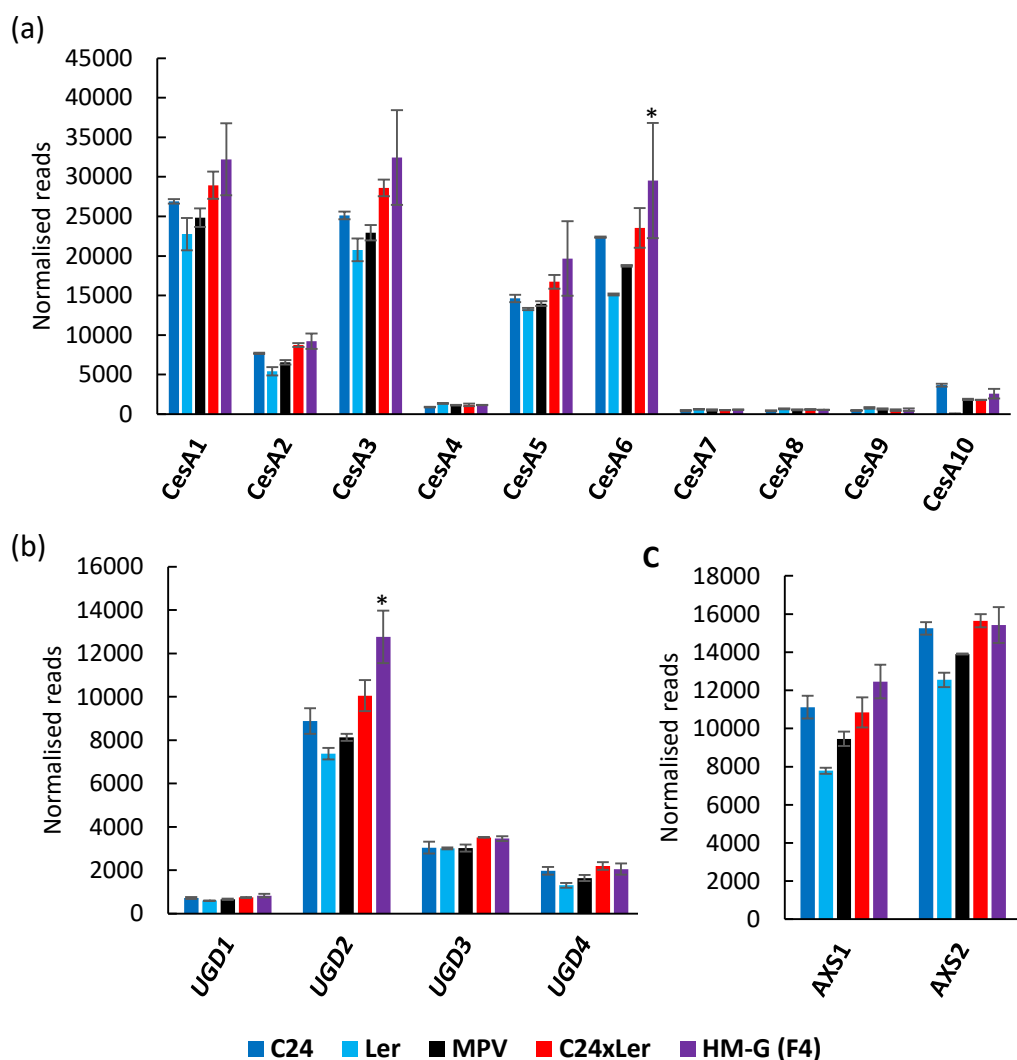

**Figure S9. Cell wall biosynthesis genes were up-regulated in the C24/Ler hybrids and Hybrid Mimic line.** Relative expression of 10 *Cesa* genes (*Cesa1-10*) (a), four *UGD* genes (*UGD1-4*) (b) and two *AXS* genes (*AXS1* and *AXS2*) (c) in the rosette leaves of 28 d-old parents C24 and *Ler*, C24x*Ler* hybrid, F4 Hybrid Mimic line HM-G. For each gene the expression levels in each plant line were normalized reads. The data represents the mean of two biological replicates. Error bars = SE. \* indicates significant differences at  $P$  (Student's  $t$  test)  $< 0.05$  from MPV.

# Fig.S10

## ❖ Transcriptome

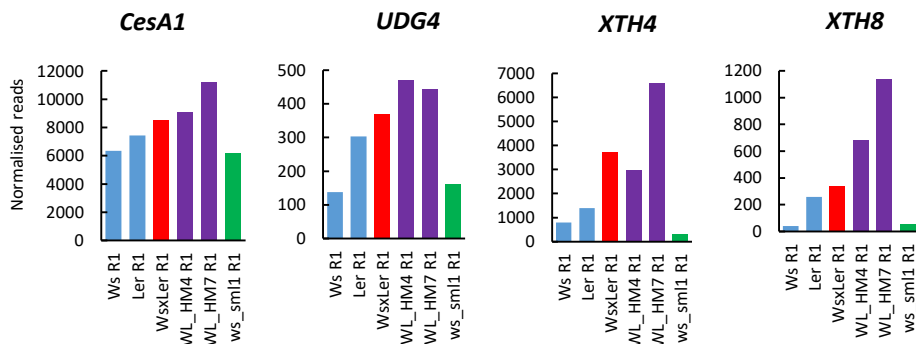

## ❖ Real-time PCR

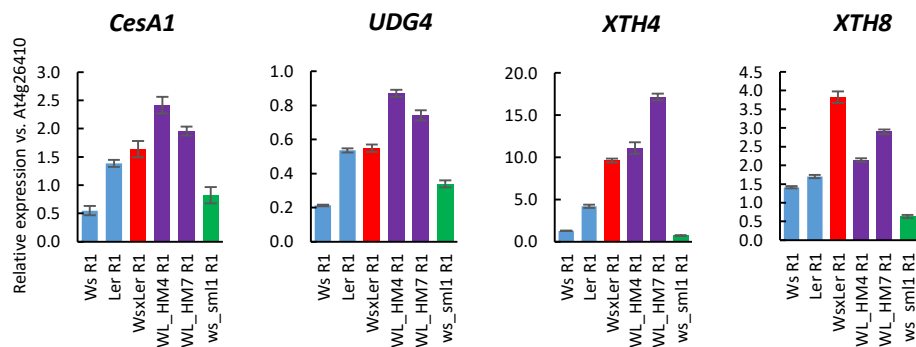

**Figure S10. The up-regulation of four cell wall related genes in Ws/Ler Hybrid and Mimics was validated by quantitative real-time PCR. Error bars = SE of three technical replicates.**

**Fig.S11**

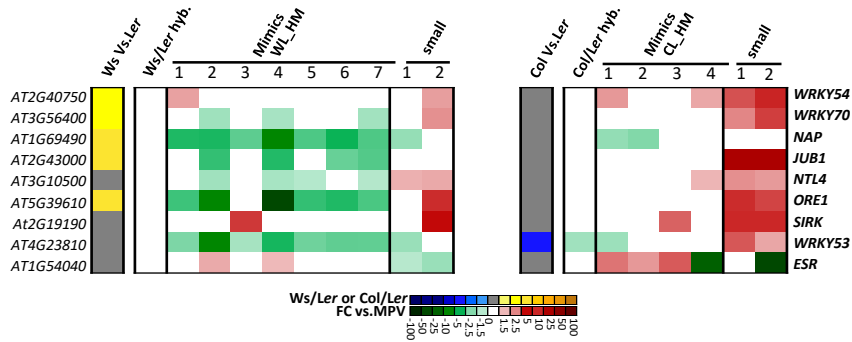

**Figure S11. The expression levels of genes associated with senescence in the parents, hybrids and F7 lines.** Different red/green colors indicate the up-/down-regulated fold change from the MPV. Blue/yellow colour indicates the comparison between the two parents in Ws/Ler or Col/Ler system.

**Fig.S12**

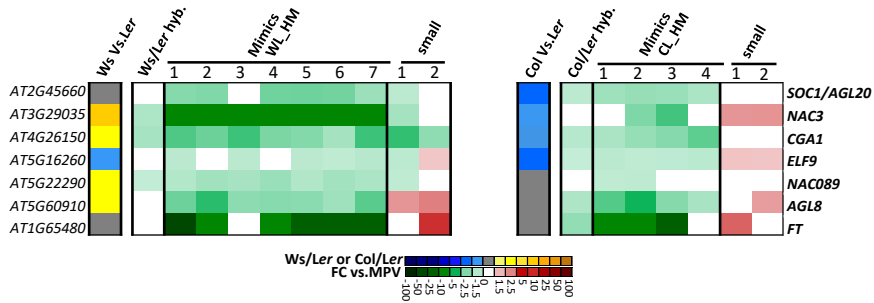

**Figure S12. Hybrids and Mimics had differentially expressed genes associated with flowering time and shoot system development.** Different red/green colors indicate the up-/down-regulated fold change from the MPV. Blue/yellow colour indicates the comparison between the two parents in Ws/Ler or Col/Ler system.

**Fig.S13**

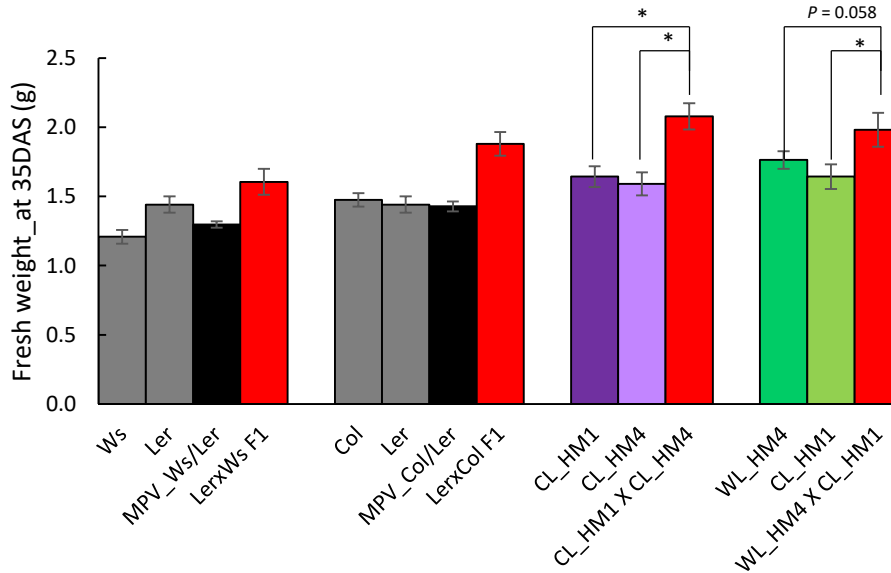

**Figure S13. Fresh weights of wild type parents Ws, Col and Ler, LerxWs F1 hybrids, LerxWs F1 hybrids, Hybrid Mimics and inter cross progeny at 35 DAS. Error bars = SE. n > 10.**

\*indicates significant differences at  $P$  (Student's t test) < 0.05.
